# Supplementary material for: One-pot one-step deracemization of amines using ω-transaminases
Source: Royal Society of Chemistry journal article supplement (doi:10.1039/c3cc43348j), 2013-01-01
Supplement: c3cc43348j.pdf [file c3cc43348j.pdf]

## Electronic Supplementary Information

### One-pot one-step deracemization of amines using $\omega$ -Transaminases

**Giyoung Shin,<sup>a</sup> Sam Mathew,<sup>a</sup> Minsu Shon<sup>a</sup> and Byung-Gee Kim,<sup>b</sup> and Hyungdon Yun<sup>a</sup> \***

*<sup>a</sup>School of Biotechnology, Yeungnam University, Gyeongbuk, 712-702, Korea.*

*E-mail: [hyungdon@ynu.ac.kr](mailto:hyungdon@ynu.ac.kr); Fax: +82-53-810-4769*

*<sup>b</sup>School of Chemical and Biological Engineering, Seoul National University, Seoul 151-742, South Korea.*

## 1. Materials

Glucose dehydrogenase from *Pseudomonas* sp., L-Lactic dehydrogenase from rabbit muscle, pyridoxal 5'-phosphate hydrate (PLP), and  $\beta$ -Nicotinamide adenine dinucleotide (NADH) were purchased from Sigma-Aldrich, Korea. All other chemicals used were of analytical or reagent grade.

## 2. Enzyme expression and purification

$\omega$ -TA from *Polaromonas* sp. JS666 ((S)- $\omega$ -TAPO) and  $\omega$ -TA from *Vibrio fluvialis* JS17 ((S)- $\omega$ -TAVF) were expressed and purified as described elsewhere.<sup>1,2</sup> In the case of  $\omega$ -TA from *Mycobacterium vanbaalenii* ((R)- $\omega$ -TAMV) and  $\omega$ -TA from *Neosartorya fischeri* ((R)- $\omega$ -TANF)<sup>3</sup>, both genes were chemically synthesized after codon optimization complying with the codon preferences of *E. coli* (Bioneer Inc., Taejeon, South Korea). Both synthetic genes were supplied by Bioneer Inc. after cloning in the pGEM-T easy vector (Promega, Madison, WI). The synthetic gene of (R)- $\omega$ -TAMV was digested with *NdeI/NotI* and the synthetic gene of (R)- $\omega$ -TANF was digested with *EcoRI/XhoI*, after which both genes were inserted into the IPTG-inducible expression vector pET24ma. The plasmid was then introduced into *E. coli* (BL21) and the transformants were grown at 37°C in 1L LB broth containing 100  $\mu\text{g mL}^{-1}$  of kanamycin. When the OD<sub>600</sub> reached 0.6, IPTG was added to a final concentration of 0.5 mM. The culture media was then immediately cooled to 20°C and incubated at the same temperature at 250 rpm. After overnight induction, the cells were harvested and washed twice with 50 mM phosphate buffer (pH 8.0). Following centrifugation, the cell pellet was resuspended in 2 volumes of 20 mM phosphate buffer (pH 7.0) containing 20  $\mu\text{M}$  pyridoxal 5'-phosphate (PLP), 1 mM PMSF, 300 mM NaCl and 5 mM imidazole. The cells were then subjected to ultrasonic disruption for 15 min, after which the protein was purified at 4°C on a Ni-NTA agarose resin obtained from Qiagen (Hilden, Germany). The crude extract was passed directly into a column containing 3 mL of Ni-NTA agarose resin and then washed with 50 mL of phosphate buffer (pH 8.0) containing 20 mM imidazole, after which the protein was eluted with phosphate buffer (pH 8.0) containing 250 mM imidazole. The eluted solution containing purified protein was dialyzed against 100 mM potassium phosphate buffer (pH 8.0) containing 20  $\mu\text{M}$  PLP, 0.2 mM EDTA, and 0.2% mercaptoethanol and then concentrated using an Amicon PM-10 ultrafiltration unit. Glycerol was

added to the purified enzyme solution (final 40% glycerol) and the samples were stored at  $-20^{\circ}\text{C}$  until further analysis.

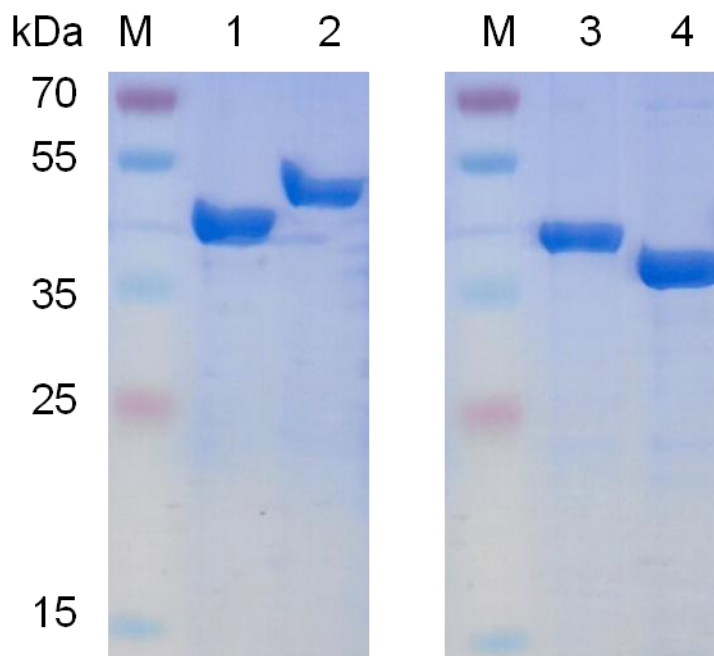

**Figure S1.** SDS-PAGE analysis of purified  $\omega$ -TAs. Lane M; Molecular weight marker, lane 1; (*S*)- $\omega$ -TAPO (47kDa), lane 2; (*S*)- $\omega$ -TAVF (48kDa), lane 3; (*R*)- $\omega$ -TAMV(37.92kDa), lane 4; (*R*)- $\omega$ -TANF (37.1kDa).

### 3. Codon optimized nucleotide sequence of (*R*)- $\omega$ -TAMV

5'-

CATATGGGCATCGACACTGGCACCTCGAACCTGGTGGCGGTGGAGCCGGGGGCG  
ATTCGCGAGGACACACCGGCAGGCAGCGTCATCCAGTATTCCGATTACGAGATTG  
ATTACAGCTCGCCGTTTCGCGGGCGGCGTGGCGTGGATTGAGGGTGAGTACCTGC  
CGGCCGAAGATGCGAAAATTAGCATCTTCGACACCGGTTTCGGCCACTCGGACCT  
GACCTACACGGTGGCGCACGTTTGGCACGGCAACATTTTCCGCTTGGGCGATCAC  
CTGGACCGCCTGCTCGACGGCGCACGGAAGCTCCGCCTGGACAGCGGCTACACC  
AAAGACGAGCTCGCCGACATCACCAAGAAGTGCGTGAGCCTGAGCCAGCTGCGT  
GAAAGCTTCGTGAACCTGACCATCACCCGCGGGTACGGCAAGCGCAAGGGGGAA  
AAGGACCTGAGCAAGCTGACCCACCAAGTGTACATTTACGCCATTCCGTATCTGTG  
GGCGTTCCCCCGGCGGAGCAGATCTTCGGCACCAACCGCGGTGGTGCCGCGCCA  
CGTGCGCCGCGCCGGCCGCAATACCGTGGACCCGACCATCAAGAACTACCAGTG  
GGGCGACCTGACCGCGGCCAGCTTCGAGGCTAAGGATCGGGGCGCGCGCACCG  
CCATTCTGATGGACGCGGACAACCTGCGTCGCGGAGGGCCCGGGATTCAACGTGT  
GCATTGTGAAGGACGGCAAGCTGGCAAGCCCGTCCCGCAACGCGCTGCCGGGCA  
TCACCCGCAAGACCGTGTTTCGAGATTGCGGGAGCCATGGGAATTGAAGCGGCGC  
TCCGCGACGTGACCTCCCATGAGCTGTACGACGCCGACGAGATTATGGCGGTGAC  
CACCGCGGGCGGCGTGAACCCGATTAACACCCTGGACGGCGTGCCGATCGGCGA  
CGGCGAGCCGGGTCCGGTGAACCGTGGCGATTTCGCGACCGCTTCTGGGCGCTGAT  
GGACGAGCCGGGGCCACTGATTGAAGCGATTACGTACGCGGCCGC-3'

#### 4. Codon optimized nucleotide sequence of (*R*)- $\omega$ -TANF

5'-

GAATTCATGGCCTCTATGGACAAAGTCTTTTCGGGATATCATGCGCGCCAGAAGCT  
GCTTGAACGGAGCGACAATCCTTTCTCTAAGGGCATTGCCTATGTGGAAGGAAAG  
CTCGTCTTACCCAGCGACGCCAGAATACCGCTACTTGACGAAGGCTTCATGCACG  
GTGACCTAACTTATGATGTTACAACGGTTTGGGATGGACGCTTCTTTTCGATTGGAT  
GATCATATGCAACGGATCCTGGAAAGCTGCGATAAAATGCGGCTCAAGTTCCCACT  
TGCACCGAGCACGGTGAAAAATATCCTGGCTGAGATGGTCGCCAAGAGTGGTATT  
CGGGATGCGTTTGTGGAAGTTATCGTGACACGTGGTCTGACAGGTGTACGTGGTT  
CGAAGCCCGAGGATCTGTATAATAACAACATACCTGCTTGTTCTCCCATACGTTT  
GGGTTATGGCGCCTGAGAACCAGCTCCTTGGTGGCAGTGCTATCATTACAAGGAC  
AGTGCGACGAACACCCCCGGGTGCATTTGATCCTACGATCAAAAATCTACAGTGG  
GGTGACTTAACAAAGGGACTTTTTGAGGCAATGGACCGTGGCGCAACGTACCCAT  
TTCTCACTGACGGAGACACCAACCTTACCGAAGGATCTGGATTTAACATTGTCTTG  
GTGAAGAACGGTATTATCTATACCCCTGATCGAGGTGTCTTGCGAGGGATCACAC  
GTAAAAGTGTGATTGACGTTGCCCGAGCCAACAACATCGACATCCGCCTTGAGGT  
CGTACCAGTGGAGCAGGTTTATCACTCCGATGAAATCTTCATGTGCACAACAGCCG  
GTGGCATTATGCCTATAACGTTGCTTGATGGTCAACCAGTTAATGACGGCCAGGTT  
GGCCCGATCACAAAGAAGATATGGGATGGTACTGGGAGATGCACTACAATCCGG  
CGTATAGTTTTCCGGTCGACTATGGCAGTGGCCTCGAG-3'

#### 5. Enzyme assay

One unit of activity was defined as the amount of enzyme that produced 1  $\mu$ mol acetophenone per minute. Reaction conditions; incubation of 1 mL of reaction volume, 100 mM phosphate buffer (pH 7.0), 10 mM pyruvate, 10 mM (*S*)- $\alpha$ -MBA (or (*R*)- $\alpha$ -MBA) and the enzyme (1–20  $\mu$ g mL<sup>-1</sup>) for 30 min at 37°C. Different concentrations of enzymes were used to measure the exact specific activity. When 2–10% acetophenone had formed, the specific activity was determined.

#### 6. Analytical methods

##### 6.1 Analysis of amines ( $\alpha$ -MBA and d1–d8)

The conversion and *ee* analysis of amines was performed accomplished by HPLC using a Crownpak CR (Daicel Co., Japan) column at 210 nm with an elution of pH 1.5 perchloric acid solution ( $0.6 \text{ mL min}^{-1}$ ). Each enantiomer was separated by these analytical conditions except **d4**. Quantitative chiral analysis of **d4** was performed using a C<sub>18</sub> symmetry column (Waters, MA) with a Waters HPLC system at 254 nm after derivatization of the sample with GITC.<sup>2</sup> Separation of each enantiomer of **d4** was achieved through an isocratic elution with a mixture of 50% methanol and 50% water (0.1% TFA) at a flow rate of  $1.0 \text{ mL min}^{-1}$ .

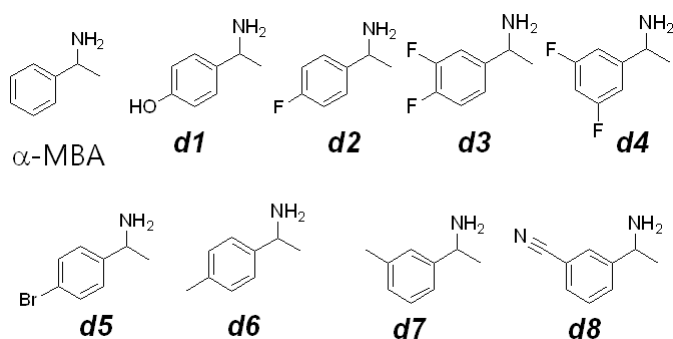

**Figure S2.** Amine structures.

**Table S1.** Amine retention times

| Substrate              | Retention time (min) <sup>a</sup> |       |
|------------------------|-----------------------------------|-------|
|                        | (S)                               | (R)   |
| $\alpha$ -MBA          | 15.9                              | 22.3  |
| <b>d1</b>              | 17.5                              | 30    |
| <b>d2</b>              | 38.2                              | 56    |
| <b>d3</b>              | 49.3                              | 58.7  |
| <b>d4</b> <sup>b</sup> | 19.9                              | 17.8  |
| <b>d5</b>              | 81.3                              | 102.7 |
| <b>d6</b>              | 39.4                              | 49.7  |
| <b>d7</b>              | 101                               | 112.5 |
| <b>d8</b>              | 24.5                              | 28.2  |

<sup>a</sup>sample was analyzed using a Crownpak CR(+) column.

<sup>b</sup>sample was analyzed using a C<sub>18</sub> symmetry column after GITC derivatization

## 6.2 Analysis of pyruvate and acetophenone

Pyruvate was analyzed using an Aminex HPX-87H HPLC column (Bio-Rad, CA) with an elution of 5 mM sulfuric acid solution at UV 210 nm. Acetophenone was analyzed using a C<sub>18</sub> Symmetry column (Waters, MA) with an elution mixture of 50% methanol and 50% water (0.1% TFA) at a flow rate of 1.0 mL min<sup>-1</sup>.<sup>2</sup>

## References

1. H. Yun, B. Y. Hwang, J. H. Lee, B. G. Kim, *Appl. Environ. Microbiol.* 2005, **71**, 4220-4224.
2. H. S. Bea, H. J. Park, S. H. Lee, H. Yun, *Chem. Commun.* 2011, **47**, 5894-5896.
3. M. Hohne, S. Schatzle, H. Jochens, K. Robins, U. T. Bornscheuer, *Nat. Chem. Biol.* 2010, **6**, 807-813.
